# Supplementary material for: AuNP/Cu-TCPP(Fe) metal–organic framework nanofilm: a paper-based electrochemical sensor for non-invasive detection of lactate in sweat
Source: Royal Society of Chemistry journal article supplement (doi:10.1039/d2nr06342e), 2023-01-01
Supplement: d2nr06342e1.pdf [file d2nr06342e1.pdf]

AuNPs/Cu-TCPP(Fe) Metal-Organic Framework Nanofilm: Paper-based  
Electrochemical Sensor for Non-invasive Detection of Lactate in Sweat

Guangna Ji<sup>a,b</sup>, Wenyan Zhu<sup>a,b</sup>, Xuexia Jia<sup>b</sup>, Shuafeng Ji<sup>b</sup>, Dianpeng Han<sup>b</sup>,  
Zhixian Gao<sup>b</sup>, Hui Liu<sup>a,\*</sup>, Yu Wang<sup>b,\*</sup>, Tie Han<sup>b,\*</sup>

<sup>a</sup> School of Public Health Lanzhou University, Lanzhou 730000, P.R.  
China

<sup>b</sup> Tianjin Institute of Environmental and Operational Medicine, Tianjin  
300050, P.R.China

\*Correspondence:

Hui Liu, School of Public Health Lanzhou University  
222 Tianshui South Road, Chengguan District, Lanzhou 730000, China  
Email: [liuhui@lzu.edu.cn](mailto:liuhui@lzu.edu.cn)

Yu Wang and Tie Han, Tianjin Institute of Environmental and  
Operational Medicine, Tianjin 300050, China.

Emails: [wangyuyu9210@163.com](mailto:wangyuyu9210@163.com) (YW);

[hantietj@163.com](mailto:hantietj@163.com) (TH)

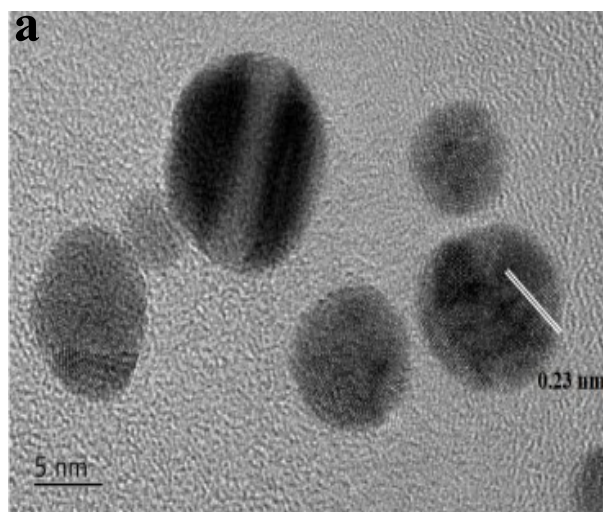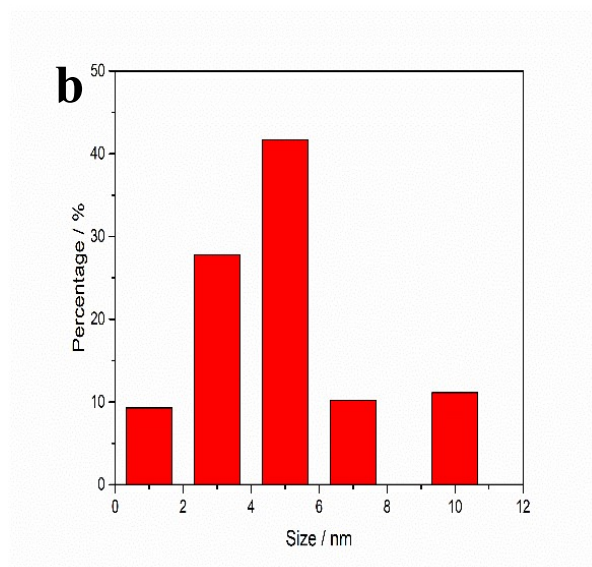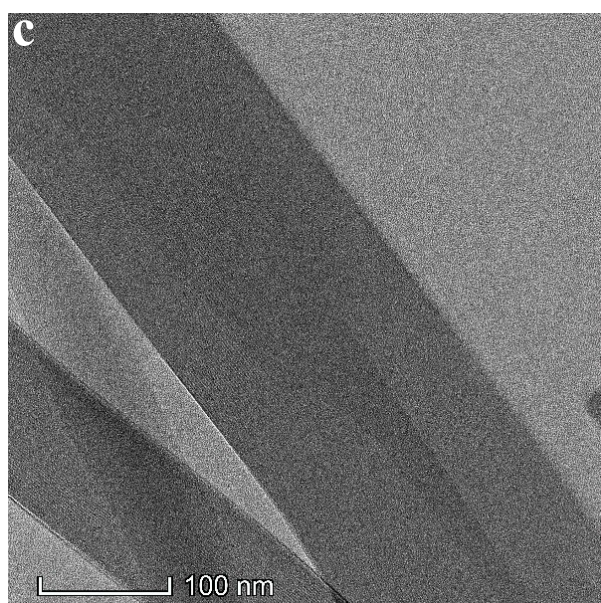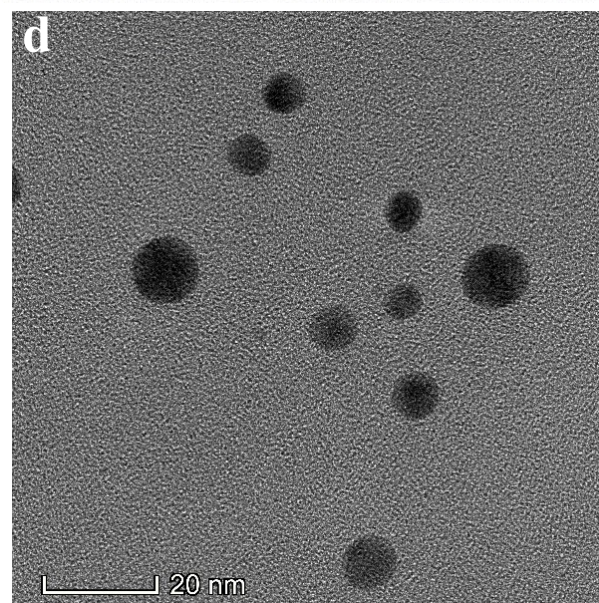

Fig S1. a,c,d) TEM images of AuNPs/Cu-TCPP(Fe) hybride nanosheets.

b) Size distribution histogram of Au NPs nanosheets.

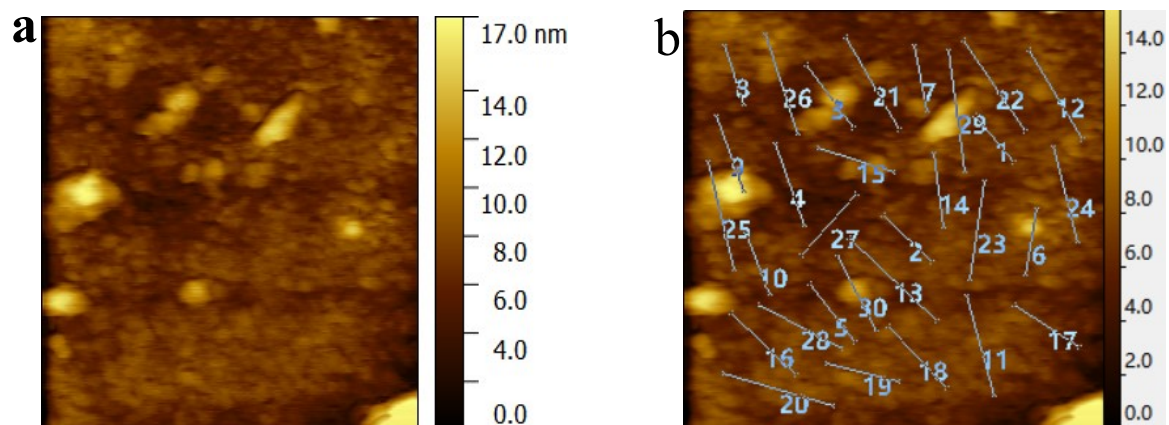

Fig S2. a,b) AFM image of 2D Cu-TCPP(Fe) nanosheets.

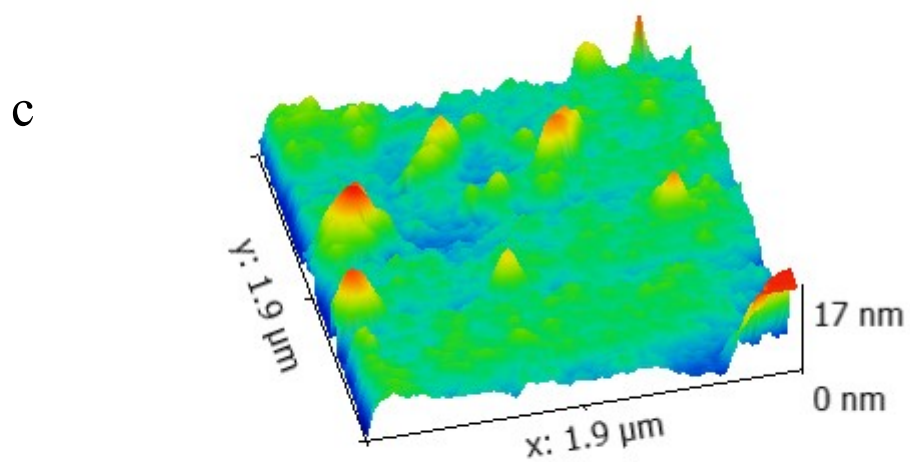

Fig S3. 3D image of AFM of 2D Cu-TCPP(Fe) nanosheets.

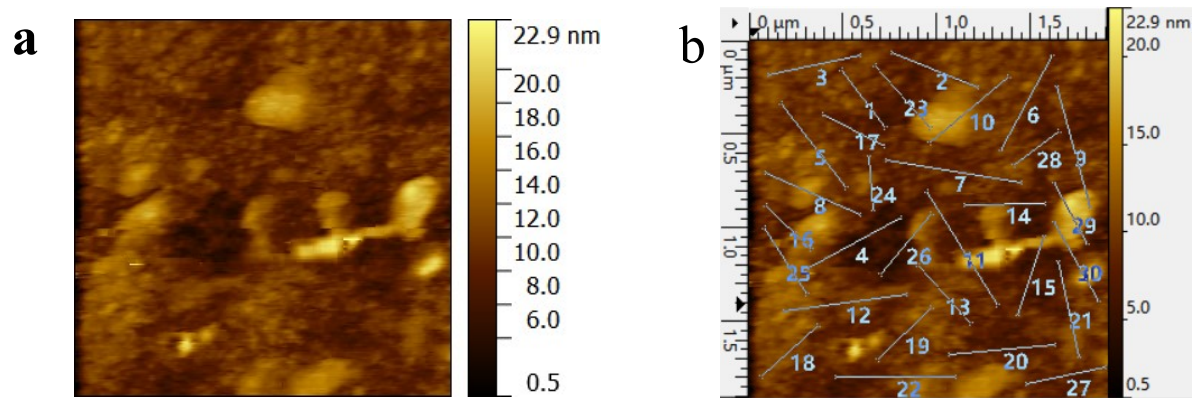

Fig S4. a,b) AFM image of Au NPs/Cu-TCPP(Fe) hybrid nanosheets.

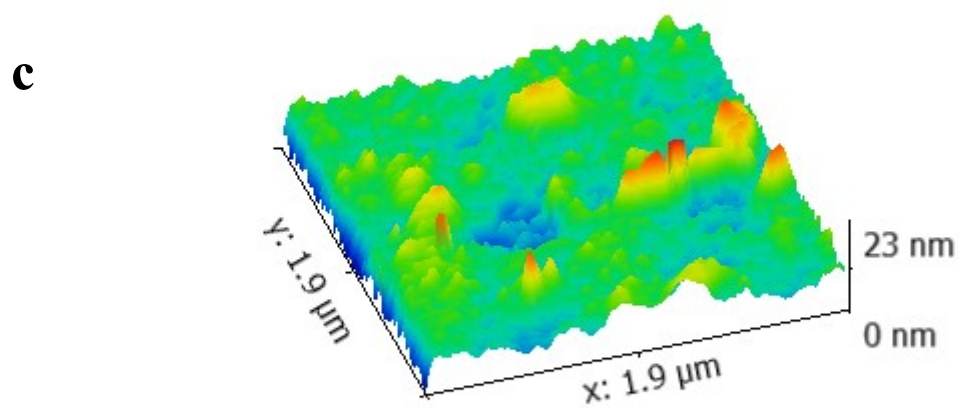

Fig S5. 3D image of AFM of Au NPs/Cu-TCPP(Fe) hybrid nanosheets.



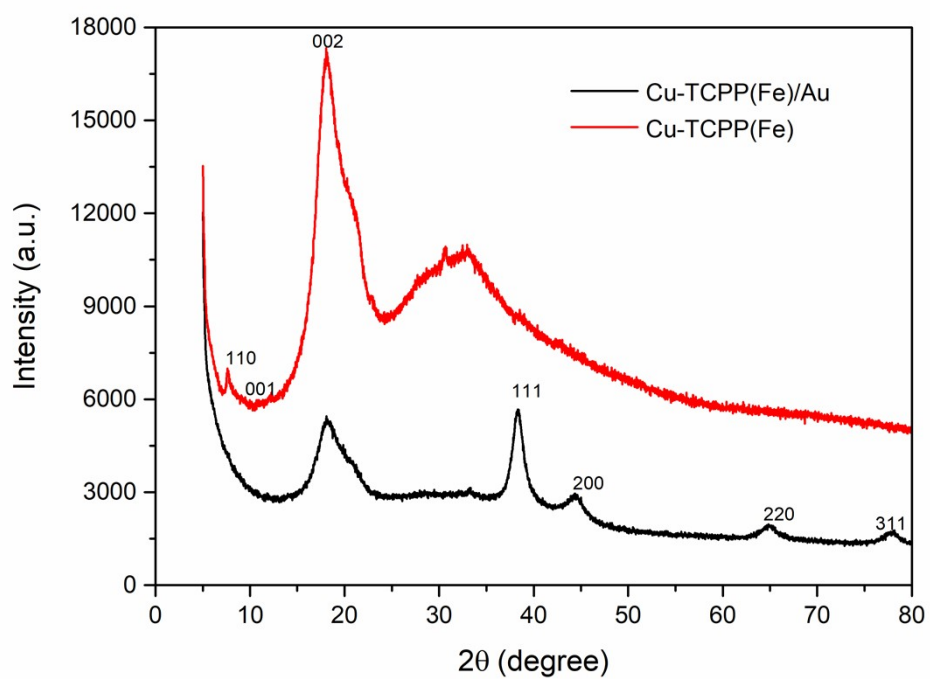

Fig S6. XRD patterns of 2D Cu-TCPP(Fe) nanosheets (red line) and Au NPs/Cu-TCPP(Fe) hybrid nanosheets.

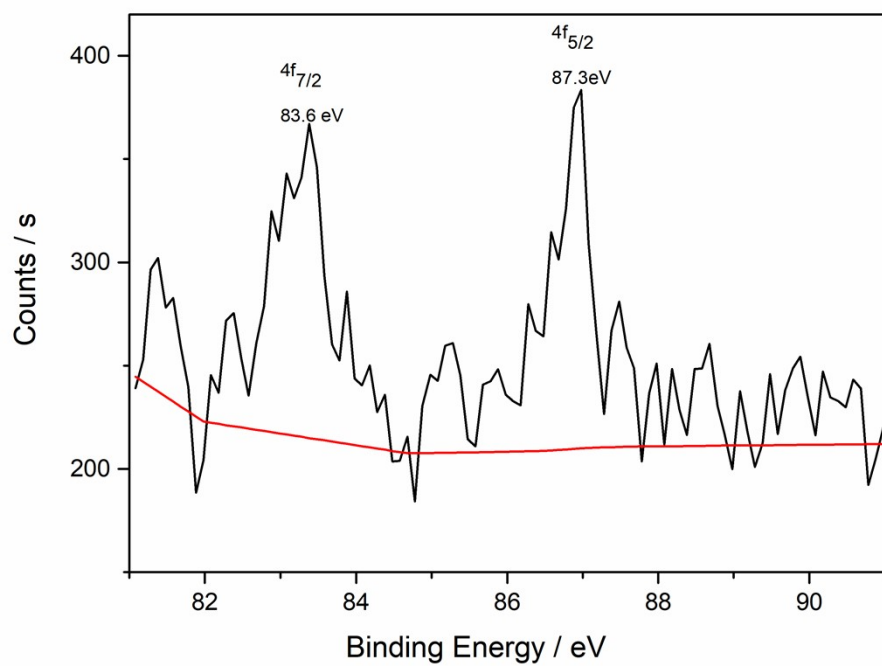

Fig S7. Au 4f XPS spectrum of Au NPs/Cu-TCPP(Fe) hybrid nanosheets.

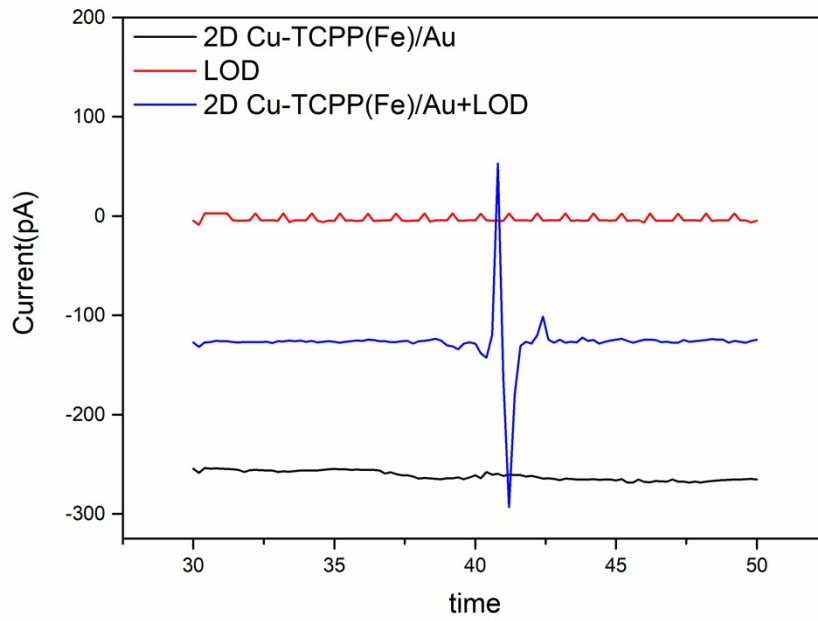

Fig S8. The feasibility of experiment.

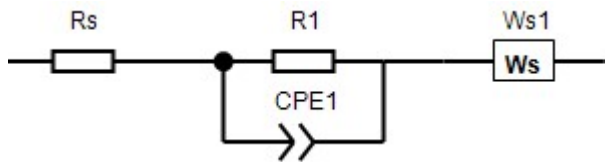

Fig S9. The diagram of equivalent circuit.

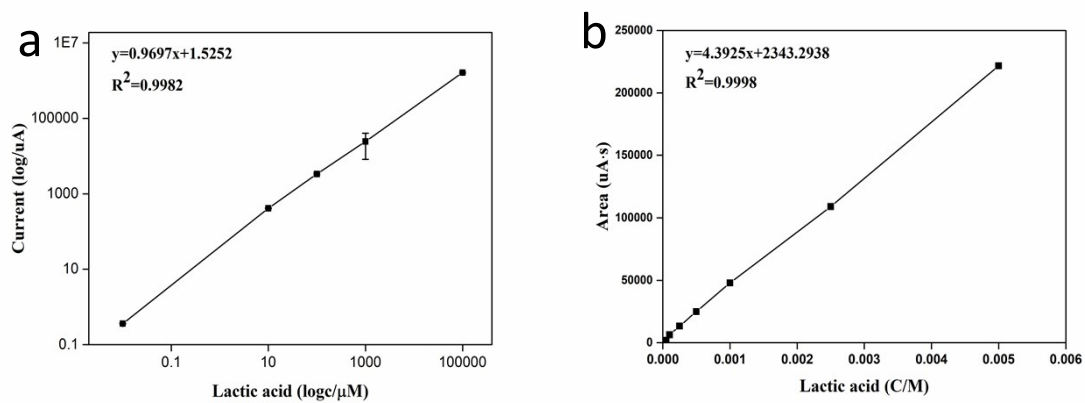

Fig S10. Standard curves for this work and HPLC a) this work: 10 nM, 10 $\mu$ M, 100 $\mu$ M, 1mM, 100 mM b) HPLC: 50 $\mu$ M, 100 $\mu$ M, 250 $\mu$ M, 500 $\mu$ M, 1 mM, 2.5 mM, 5 mM



|              |                                        | 1       | 2       | 3       | Mean    | RSD (%) |
|--------------|----------------------------------------|---------|---------|---------|---------|---------|
| Current (pA) | Same electrode (repeatability)         | 117.845 | 115.837 | 117.265 | 116.982 | 0.88    |
|              | Different electrodes (reproducibility) | 107.599 | 104.253 | 102.560 | 104.804 | 2.45    |

Table S1. The repeatability and reproducibility of lactic acid biosensors.

| Material     | Added/pM | Found/pM | Recovery/% | RSD/% |
|--------------|----------|----------|------------|-------|
| Perspiration | 0        | 2.04     | -          | 10.45 |
|              | 50       | 54.77    | 110        | 3.03  |
|              | 500      | 544.86   | 109        | 6.32  |
|              | 5000     | 5890.71  | 118        | 1.71  |

Table S2. Recovery tests of lactic acid in perspiration samples (n=6).

| Material     | Added/ $\mu$ M | Found/ $\mu$ M        | Recovery/% | RSD/% |
|--------------|----------------|-----------------------|------------|-------|
| Perspiration | 0              | $2.04 \times 10^{-6}$ | -          | 10.45 |
|              | 50             | 52                    | 104        | 9.80  |
|              | 500            | 421                   | 84         | 11.15 |
|              | 5000           | 5486                  | 110        | 18.91 |

Table S3. Recovery tests of lactic acid in perspiration samples (n=6).
